# Supplementary material for: Two Polyketides Intertwined in Complex Regulation: Posttranscriptional CsrA-Mediated Control of Colibactin and Yersiniabactin Synthesis in Escherichia coli
Source: PubMed Central journal article supplement (PMC8805033; doi:10.1128/mbio.03814-21), 2022-02-01
Supplement: mbio.03814-21-s0001.pdf [file mbio.03814-21-s0001.pdf]

## 1 Detailed description of cloning procedures and experimental methods

2 The generation of plasmids and mutant strains is described below in detail. Strains and plasmids  
3 were verified by sequencing after cloning.

### 4 Plasmids

5 **pWKS-*csrA***. The complementation vector pWKS-*csrA* was generated by amplification of *csrA*  
6 including app. 470 bp of its upstream region using *E. coli* IHE3034 as template and  
7 oligonucleotide pair *csrA*-XbaI-s/*csrA*-BamHI-as. The PCR product was digested with  
8 XbaI/BamHI and ligated with XbaI/BamHI digested pWKS30 to yield pWKS-*csrA*.

9 **pKD46-*csrA***. The sequence of *csrA* and its promoter were amplified from *E. coli* IHE3034 with  
10 oligonucleotides *csrA*-NcoI-s and *csrA*-NcoI-as, digested with NcoI and ligated with NcoI  
11 digested pKD46.

### 12 Genome modifications

13 Chromosomal modifications in *E. coli* were carried out using the Lambda Red recombinase  
14 system of Datsenko & Wanner (1). Briefly, *E. coli* strains were first transformed with pKD46  
15 (or pKD46-*csrA* for *csrA* modifications), grown in LB medium in the presence of 0.3 % L  
16 arabinose to induce expression of the Lambda Red recombinase encoded on pKD46 and then  
17 made competent for transformation with respective PCR products carrying the kanamycin or  
18 chloramphenicol cassette of pKD4 or pKD3, respectively. For this, oligonucleotides were  
19 designed in a way that PCR products carried nucleotide extensions of 50-60 bp homologous to  
20 the desired genomic site of manipulation. Clones were selected on agar containing either  
21 kanamycin (pKD4) or chloramphenicol (pKD3). After successful genomic manipulation of  
22 desired sequences, bacteria were cured from pKD46 (or pKD46-*csrA*) by serial streaking on  
23 LB agar and incubation at 37 °C. Successful curing was verified by PCR using oligonucleotide

24 pair pKD46-Seq1/pKD46-Seq2. If required, antibiotic resistance cassettes were removed by  
25 transformation with pCP20 (2), which encodes the FLP recombinase that cuts the resistance  
26 cassettes at the flanking FRT sites, thus leaving only the FRT site. Cells were cured from pCP20  
27 by serial streaking on LB agar and incubation at 37 °C.

28 ***E. coli* strains M1/5 $\Delta$ *uvrY* and SP15 $\Delta$ *uvrY*** were obtained by transformation of pKD46  
29 carrying *E. coli* M1/5 and SP15 cells with a PCR product comprising the *cat* cassette with  
30 extensions homologous to the upstream and downstream regions of *uvrY*. The PCR product was  
31 obtained by amplification of the chloramphenicol resistance cassette from pKD3 using primers  
32 ABU\_uvrY::*cat*\_Fw and ABU\_uvrY::*cat*\_Rv. Clones were selected on agar containing  
33 chloramphenicol.

34 ***E. coli* M1/5*csrA*51.** This strain was generated to synthesize a CsrA variant with reduced  
35 function by shortening of the protein by nine amino acids. It has been shown that the *E. coli*  
36 *csrA* gene is hard to manipulate (3). To facilitate chromosomal manipulation of *csrA* we  
37 modified the pKD46 plasmid, which is required for genomic modifications by the here-used  
38 methodology of Datsenko & Wanner (1), by introducing a *csrA* copy under the control of its  
39 native promoter, thus creating plasmid pKD46-*csrA*. Transformation of *E. coli* M1/5 with this  
40 plasmid did not only provide the cell with Lambda Red recombinase but also guaranteed  
41 expression of a functional CsrA protein during manipulation of the chromosomally encoded  
42 *csrA* copy. For manipulation of the genomic *csrA* copy, the kanamycin resistance cassette of  
43 pKD4 was amplified using oligonucleotide pair *csrA*51-Del-M15-up and *csrA*-Del-M15-rev.  
44 *E. coli* M1/5 pKD46-*csrA* was transformed with the PCR product, which was inserted in a way  
45 that a stop codon was placed after nucleotide 153 of the *csrA* sequence. Clones were selected  
46 on agar plates containing kanamycin.

47 ***E. coli* 536-HDM *csrA*51** was generated from *E. coli* 536-HDM as described for *E. coli*  
48 M1/5*csrA*51.

49 *E. coli* **M1/5 HPI**, a partial HPI (high pathogenicity island coding for yersiniabactin) mutant  
50 ( $\Delta ybtA$ -*fyuA*), was generated by transformation of M1/5 pKD46 with a PCR product obtained  
51 by amplification of the chloramphenicol resistance cassette of pKD3 using oligonucleotides  
52 *ybtA*-Del-for and *fyuA*-Del-rev. Clones were selected on agar plates containing  
53 chloramphenicol.

54 *E. coli* **M1/5 HPI** *csrA51* was generated from *E. coli* M1/5 HPI as described for *E. coli* M1/5  
55 *csrA51*.

56 *E. coli* strains **SP15  $\Delta csrB$** , *E. coli* **SP15  $\Delta csrC$** , *E. coli* **SP15  $\Delta csrB \Delta csrC$** . lacking either  
57 the small regulatory RNA gene *csrB*, or *csrC* or both were generated by recombineering. The  
58 *csrB* gene was replaced by a *cat* cassette, whereas *csrC* was exchanged by a *tet* cassette.  
59 Clones were selected on agar plates containing chloramphenicol or tetracycline, respectively.

60

### 61 **Construction of *venus* reporter strains and plasmids**

62 **pUC-PlacUV5-*venus***. This plasmid was generated in order to serve as a template for PCR  
63 reactions used in allelic replacements (1) to construct various chromosomally based *venus*  
64 reporter gene strains for *clbQ*, and *ybtA* (see below). The plasmid with pUC18 as a backbone  
65 contained the constitutive *lacUV5* promoter, a sequence encoding an artificial 5'UTR leader  
66 derived from pTXB1 (lacking the LacI binding site), a modified *venus* sequence as a reporter  
67 gene and a chloramphenicol resistance cassette to enable selection of clones. The sequence of  
68 the artificial 5'UTR leader (from hereon designated artificial leader and abbreviated AL) was  
69 chosen because it neither did exhibit any binding site for transcriptional regulators nor did its  
70 transcript harbour a CsrA binding motif. Sequences of *PlacUV5*, AL and *venus* were fused by  
71 an overlap PCR. A first PCR product was obtained by amplification of the translational fusion  
72 of *rplL* and the *venus* gene from pMB*rplL-venus* using oligonucleotides *venus*-fus-s and

73 *venus-fus-as* introducing a downstream SalI restriction site. A second PCR product containing  
74 the *PlacUV5*, the artificial 5'UTR leader sequence and a portion of the *rplL-venus* (from hereon  
75 *venus*) sequence was yielded by template-free PCR using oligonucleotides *PlacUV5-s* and  
76 *PlacUV5-as*. This way, an AatII restriction site was introduced upstream of *PlacUV5*. The PCR  
77 products were then fused using oligonucleotides *PlacUV5-s/venus-fus-as* and the resulting  
78 amplicon was digested with AatII and SalI and ligated with AatII/SalI digested pMB*rplL-venus*,  
79 leading to plasmid pUC-*PlacUV5-venus*.

#### 80 *clbQ-venus* fusions

81 A set of chromosomally based *clbQ-venus* fusions was constructed using allelic replacement  
82 described by Datsenko & Wanner (1). PCR products with extensions homologous to the *clbQ*  
83 locus were generated with pUC-*PlacUV5-venus* as a template.

84 ***E. coli* M1/5 P*clbQ-clbQ*'-'*venus***. A translational fusion of the *clbQ* start codon and the *venus*  
85 sequence was obtained by amplification of the *venus* sequence and the chloramphenicol  
86 resistance cassette with oligonucleotides *clbQ-TLN1-venus-s* and *clbQ-cat-as*. *E. coli* M1/5  
87 pKD46 was transformed with the resulting PCR product, *venus-cat*, to yield *E. coli* M1/5  
88 P*clbQ-clbQ*'-'*venus*. This strain carried the native *clbQ* promoter as well as the native *clbQ*  
89 5'UTR but the *venus* sequence instead of *clbQ*.

90 ***E. coli* M1/5 P*clbQ-clbQ*'-'*venus csrA51*** was generated from *E. coli* M1/5 P*clbQ-clbQ*'-'*venus*  
91 as described above for *E. coli* M1/5*csrA51*.

92 ***E. coli* M1/5 P*lacUV5-clbQ*'-'*venus***. To construct a *clbQ* leader fusion with the constitutive  
93 *lacUV5* promoter, the native *clbQ* 5'UTR and *venus* as reporter, first the *clbQ* promoter of  
94 *E. coli* M1/5 was exchanged by the constitutive *PlacUV5*. Therefore, *PlacUV5* from  
95 pUC-*PlacUV5-venus* was amplified with oligonucleotides *Kan-Plac-fus-s* and  
96 *clbQ-PlacUV5-as*. The resulting PCR product was fused downstream of the FRT site-flanked

97 kanamycin resistance cassette previously amplified from pKD4 using *clbQ*-*PlacUV5*-s and  
98 *Kan-Plac-fus-as*. The resulting PCR product, *Kan-PlacUV5*, carried nucleotide extensions  
99 homologous to the upstream region of the *clbQ* transcription start. After transformation of  
100 *E. coli* M1/5 (pKD46) this amplicon and subsequent selection on kanamycin containing agar  
101 plates the resulting strain, *E. coli* M1/5 *Kan-PlacUV5-clbQ*, was first transformed with pKD46  
102 and afterwards with the *venus-cat* PCR sequence as described for *E. coli*  
103 M1/5 *PclbQ-clbQ*'-'*venus*, leading to *E. coli* M1/5 *Kan-PlacUV5-clbQ*'-'*venus*. Transformation  
104 with pCP20 led to the removal of the kanamycin resistance cassette and the final strain was  
105 designated to *E. coli* M1/5 *PlacUV5-clbQ*'-'*venus*.

106 *E. coli* M1/5 *PlacUV5-clbQ*'-'*venus csrA51* was generated from *E. coli* M1/5 *PlacUV5-clbQ*'-'  
107 '*venus* as described above for *E. coli* M1/5*csrA51*.

108 *E. coli* M1/5 *PlacUV5-clbQ*\*-'-'*venus* was a derivative of *E. coli* M1/5 *PlacUV5-clbQ*'-'*venus*  
109 except that the sequence encoding the putative CsrA binding site within *clbQ* 5'UTR was  
110 changed from ACAAGGA to TTATGGA. With oligonucleotides *clbQ*-TLN-TTAT-*venus*-s  
111 and *clbQ-cat*-as the *venus-cat* sequence from pUC-*PlacUV5-venus* was amplified with  
112 extensions homologous to the region upstream and downstream of *clbQ*, respectively,  
113 introducing the modified sequence in the upstream extension. *E. coli* M1/5 *Kan-PlacUV5-clbQ*  
114 carrying pKD46 was transformed with this PCR amplicon and afterwards treated with pCP20  
115 to remove the kanamycin resistance cassette, resulting in the desired strain *E. coli* M1/5  
116 *PlacUV5-clbQ*\*-'-'*venus*.

117 *E. coli* M1/5 *PlacUV5-clbQ*\*-'-'*venus csrA51* was generated from *E. coli* M1/5 *PlacUV5*-  
118 *clbQ*\*-'-'*venus* as described above for *E. coli* M1/5*csrA51*.

119 *E. coli* M1/5 *PclbQ-AL*'-'*venus*. This strain carried a fusion of the *clbQ* promoter with the  
120 sequence encoding the artificial leader and the *venus* sequence of pUC-*PlacUV5-venus* being

121 amplified with oligonucleotides *clbQ*-TXN-*venus*-s and *clbQ*-*cat*-as. Transformation of  
122 *E. coli* M1/5 (pKD46) with this product yielded the desired strain.

123 *E. coli* M1/5 P*clbQ*-AL-'*venus csrA51* was generated from *E. coli* M1/5 P*clbQ*-AL-'*venus* as  
124 described above for *E. coli* M1/5*csrA51*.

#### 125 *ybtA-venus* fusions

126 Genome modifications. At first, a leader fusion of *ybtA* with the *venus* gene as a reporter was  
127 generated in the bacterial chromosomal using the method of Datsenko & Wanner (1).  
128 Chromosomal insertion of *venus* was performed in a way, that only the start codon of *ybtA*  
129 remained.

130 *E. coli* M1/5 M1/5 Py*ybtA-ybtA*'-'*venus*. In more detail, the *venus* encoding sequence attached  
131 to the chloramphenicol resistance cassette (*venus-cat*) of pUC-PlacUV5-*venus* was amplified  
132 with primer pairs *ybtA*-TLN-*venus*-s2/*ybtA-cat*-as. *E. coli* M1/5 cells harbouring plasmid  
133 pKD46 for homologous recombination were transformed with the PCR product, plated on  
134 chloramphenicol containing agar and the resulting mutant strain M1/5 Py*ybtA-ybtA*'-'*venus* was  
135 selected.

#### 136 Plasmids

137 **pBAD33\***. A derivative of the medium copy vector pBAD33 devoid of the *araC* gene as well  
138 as the *araBAD* promoter, designated pBAD33\*, was constructed to create plasmid-encoded  
139 *ybtA-venus* fusions. To generate this vector, pBAD33 was digested with SacI and EcoRV,  
140 treated with Mung Bean Nuclease (MBN) and religated. Cloning of the different *ybtA-venus*  
141 fusions into this vector is described below.

142 **pBAD33-*csrA***. To obtain fusion plasmids that contained *csrA* for complementation,  
143 SacI/EcoRV digested pBAD33 was ligated with the *csrA* gene including app. 280 bp of its

144 upstream region previously cut from pWKS-*csrA*. The resulting plasmid was then digested with  
145 *ZraI* and *EagI*, treated with MBN and religated, yielding pBAD33-*csrA*.

146 **pBAD33-*venus-csrA***. This plasmid, carrying a promoterless *venus* gene as well as the *csrA*  
147 gene with its own promoter, was generated by amplification of *venus* from pUC-*PlacUV5-venus*  
148 using primer pair *venus-XbaI* and MK67, subsequent digestion of the PCR product with *XbaI*  
149 and *HindIII* and ligation with *XbaI/HindIII* digested pBAD33-*csrA*.

150 **pPybtA-*ybtA*'-'*venus2* and pPybtA-*ybtA*'-'*venus2-csrA***. These plasmids represent fusions of  
151 the *ybtA* promoter, the *ybtA* 5'UTR and *venus* as a reporter. Since the *ybtA* promoter region does  
152 not only contain the *ybtA* promoter but also the divergently oriented *ybtP* promoter, a  
153 transcription terminator had to be introduced upstream of the *ybtA* promoter to prevent  
154 expression from the *ybtP* promoter. Therefore, the *rrnB* terminator was cloned into pBAD33\*  
155 and pBAD33-*csrA*. The terminator was amplified from pBAD33 using primer pair  
156 *rrnB-XbaI-for/rrnB-SacI-rev2*, digested with *XbaI* and *SacI* and ligated with *XbaI/SacI*  
157 digested pBAD33\* or pBAD33-*csrA* leading to pBAD33-*rrnB* or pBAD33-*csrA-rrnB*,  
158 respectively. A sequence harbouring the *ybtA* promoter region, the *ybtA* 5'UTR as well as the  
159 *venus* gene, was amplified from *E. coli* M1/5 PybtA'-*ybtA-venus* using primer pair *ybtA-TLN-*  
160 *XbaI* and MK67, digested with *XbaI* and *SphI* and ligated with *XbaI/SphI* pBAD33-*rrnB*. The  
161 resulting plasmid pPybtA-*ybtA*'-'*venus1* contained a translational fusion of the first three  
162 nucleotides of *ybtA* and the *venus* gene. In an additional step, the *ybtA* sequence was extended  
163 from three to twelve nucleotides in a restriction-free cloning strategy (Unger et al., 2010) using  
164 pPybtA-*ybtA*'-'*venus1* as a template and *ybtA-long-for* and *ybtA-long-rev* as primers, yielding  
165 plasmid pPybtA-*ybtA*'-'*venus2*. Plasmid pPybtA-*ybtA*'-'*venus2-csrA* was generated by digestion  
166 of pPybtA-*ybtA*'-'*venus2* with *XbaI* and *SphI* and cloning of the PybtA-*ybtA*'-'*venus* sequence  
167 into *XbaI/SphI* digested pBAD33-*csrA-rrnB*.

168 **pPybtA-ybtA\*'-'venus2.** The sequence encoding the putative CsrA binding motif within the  
169 *ybtA* leader of pPybtA-ybtA'-'venus2 was modified on DNA basis from ACAGGGA to  
170 TTATGGA using the respective plasmids as templates with the primer pair  
171 *ybtA-TLN-TTAT-for/ybtA-TLN-TTAT-rev* by restriction-free cloning. The resulting plasmid  
172 was designated pPybtA-ybtA\*'-'venus2.

173 **pPlacUV5-AL-venus.** A plasmid carrying a fusion of the *lacUV5* promoter, a sequence  
174 encoding the 5' untranslated region without CsrA binding motif (artificial leader, AL) and the  
175 *venus* sequence and was designed to be used as a control for CsrA-independent regulation of  
176 various *ybtA*- and *fyuA-venus* fusions. In a first step, the *PlacUV-AL* fusion with a partial *venus*  
177 sequence was amplified from template vector pUC-*PlacUV5-venus* with primers  
178 *Kan-Plac-fus-s* and *venus-Seq-as*. In a second step, this PCR product served as a megaprimer  
179 and plasmid p*PlacUV5-ybtA'-'venus1* as a template in a restriction-free cloning approach as  
180 described above to generate p*PlacUV5-AL-venus*.

181 **pPybtA-AL-venus.** This plasmid carried a fusion of the *ybtA* promoter, a sequence encoding  
182 the 5' untranslated region without CsrA binding motif (artificial leader, AL) and the *venus*  
183 sequence. A megaprimer pair was generated via PCR using p*PlacUV5-AL-venus* as a template  
184 and primers *ybtA-TXN-for* and *venus-Seq-as2*. Next, these megaprimers were used to replace  
185 the *ybtA* 5'UTR of plasmid pPybtA-ybtA'-'venus2 by the AL using restriction-free cloning as  
186 described above, leading to pPybtA-AL-venus.

187

188



189 **Megalocytosis and  $\gamma$ H2AX assays**

190 HeLa cells, maintained by serial passage in DMEM supplemented with 10 % FCS and non-  
191 essential amino acids at 37 °C and 5 % CO<sub>2</sub>, were used to demonstrate the cytotoxic effect of  
192 colibactin on mammalian cells. Colibactin has been shown to induce double strand breaks,  
193 which leads to cell cycle arrest and therefore formation of megalocytotic cells (4).

194 For assays to demonstrate megalocytosis induced by colibactin-producing bacteria,  
195  $2.5 \times 10^4$  HeLa cells per well were seeded in a 24-well cell culture plate. To examine the extent  
196 of DNA double strand breaks using serine139-phosphorylated H2AX,  $\gamma$ H2AX, induced by  
197 bacteria synthesizing colibactin,  $1.25 \times 10^5$  HeLa cells were dispersed in a 6-well cell culture  
198 plate. The next day, bacterial overnight cultures were used to infect HeLa cells with a  
199 multiplicity of infection (MOI) of 200 in interaction medium (DMEM, 5 % FCS,  
200 25 mM HEPES). Four hours post infection, cells were washed 4-8 times with 1x Hank's  
201 Balanced Salt Solution (HBSS) (Thermo Fisher Scientific, Wesel, Germany) containing 100  $\mu$ g  
202 mL<sup>-1</sup> gentamycin and further incubated at 37 °C and 5 % CO<sub>2</sub> in DMEM with 10 % FCS, non-  
203 essential amino acids and 200  $\mu$ g mL<sup>-1</sup> gentamycin (600  $\mu$ g mL<sup>-1</sup> gentamycin for cells infected  
204 with *E. coli* strains carrying the *csrA51* mutation).

205 For demonstration of megalocytosis, cells were washed twice with 1x HBSS 72 h post  
206 infection, afterwards fixed with methanol, stained with 10 % Giemsa stain (Sigma-Aldrich,  
207 Munich, Germany) and then used for microscopy.

208 For  $\gamma$ H2AX detection, cells were washed eight hours post infection with ice-cold phosphate  
209 buffered saline (137 mM sodium chloride, 2.7 mM potassium chloride, 10.1 mM disodium  
210 hydrogen phosphate, 1.8 mM potassium dihydrogen phosphate, pH 7.4) and immediately  
211 suspended and lysed with sample buffer (32.9 mM Tris, 15 % (v/v) glycerol, 0.5 % sodium  
212 dodecyl sulfate, pH 6.8). Total protein in cell extracts was quantified using BCA reagent  
213 (Thermo Fisher Scientific). 4-5  $\mu$ g total protein were first separated by SDS-PAGE using 4-  
214 20 % Mini-Protean-TGX gels (Bio-Rad, Munich, Germany) and then transferred onto a

215 polyvinyl difluoride (PVDF) membrane. For the detection of  $\gamma$ H2AX antibody anti- $\gamma$ H2A.X  
216 (phospho S139) antibody (Abcam, Cambridge, UK) and as secondary antibody Peroxidase  
217 AffiniPure goat anti-rabbit IgG (H+L) (Dianova, Hamburg, Germany) were used. Alternatively,  
218 anti-phospho-Histone H2A.X (Ser139), clone EP854(2)Y (Merck-Millipore, Darmstadt,  
219 Germany) served as a primary antibody for detection of  $\gamma$ H2AX. As a control,  $\beta$ -actin was  
220 detected with anti-beta actin [AC-15] antibody (HRP) (Abcam). As substrate for horseradish  
221 peroxidase Bio-Rad Clarity Western ECL-substrate was used (Bio-Rad). Blots were analysed  
222 using the ChemiDoc XRS+ system (Bio-Rad).

223

#### 224 **N-myristoyl-D-asparagine (C14-Asparagine) quantification**

225 Cultures in 9.5 mL DMEM-Hepes (Gibco) inoculated with 500  $\mu$ L o/n LB culture were used  
226 for lipid extraction. After 24 h, the OD<sub>600</sub> was measured and the culture was centrifuged for  
227 5 min at 5000  $\times$  g and 4 °C. Pellets were resuspended in 500  $\mu$ L HBSS and frozen at -80 °C  
228 until lipid extraction.

229 Pellets were crushed in Lysing Matrix A tubes (MP biomedicals, Santa Ana, California, USA)  
230 with a Precellys instrument (5 m/s; 2 x 30 s) (Ozyme, Montigny le Bretonneux, France) after  
231 addition of 5  $\mu$ L internal standard (IS) mixture (Deuterium-labeled compounds: 400 ng/mL).  
232 After two crush cycles (5 m/s, 30 s), 0.3 mL of cold methanol (MeOH) was added and samples  
233 were centrifuged at 1016  $\times$  g for 15 min (4 °C). HLB plates (OASIS® HLB 2 mg, 96-well plate,  
234 Waters, Ireland) were used for solid phase extraction of lipids after being conditioned with 0.5  
235 mL MeOH and 0.5 mL H<sub>2</sub>O/ MeOH (90:10, v/v). Samples' volumes were brought to 2 mL with  
236 water and then loaded on the plate at a flow rate of about one drop per 2 s. After complete  
237 loading, columns were washed with 0.5 mL H<sub>2</sub>O/ MeOH (90:10, v/v) and dried under  
238 aspiration. Lipids were eluted with 750 $\times$   $\mu$ L MeOH and extracts were submitted to two series  
239 of evaporation under N<sub>2</sub>, then resuspended in a final volume of 10  $\mu$ L MeOH for quantification  
240 of C14-Asn.

241 The quantification of C14-Asn was performed by the MetaToulLipidomics Facility (INSERM  
242 UMR1048, Toulouse, France). They developed a quantification assay by high-performance  
243 liquid chromatography tandem mass spectrometry analysis (LC-MS/MS) (5). Briefly a high-  
244 performance liquid chromatography (HPLC, Agilent 1290 Infinity) was designed to separate  
245 the metabolites using a C18 column. The HPLC system was coupled online to an Agilent 6460  
246 triple quadrupole MS for detection and quantification (Agilent Technologies). Analyses were  
247 performed in Multiple Reaction Monitoring in optimal conditions. Peak detection, integration  
248 and quantitative analysis were done using Mass Hunter Quantitative analysis software (Agilent  
249 Technologies).

250

#### 251 **DNA crosslinking assay**

252 The assay was performed as previously described (6). Linearized plasmid DNA was produced  
253 by digestion of pUC19 plasmid with BamHI (New England Biolabs). For bacteria-DNA  
254 interactions,  $6 \times 10^6$  CFU were cultivated in 500  $\mu$ L micro tube under static condition at 37 °C.  
255 After 3.5 h of cultivation, 400 ng of linearized DNA and EDTA of a final concentration of 1mM  
256 were added and further incubated for 30 min. Following centrifugation for 5 min at  $5,000 \times g$   
257 to pellet bacteria, the DNA present in the supernatants was purified using the PCR Purification  
258 Kit (Qiagen) according to the manufacturer's recommendations.

259 A denaturing 1% agarose gel was prepared in a 100 mM NaCl and 2 mM EDTA solution  
260 (pH 8.0). The gel was then soaked overnight in an alkaline running buffer solution (40 mM  
261 NaOH and 1 mM EDTA, pH ~12.0). 100 ng of each DNA sample were loaded on the denaturing  
262 agarose gel. The gel was run for 45 min at 1 V/cm and then for 2 h at 2 V/cm and then  
263 neutralized for a total of 45 min in a 100 mM Tris pH 7.4 buffer solution containing 150 mM  
264 NaCl, changed frequently. The gel was stained with GelRed and revealed with UV exposure  
265 using the ChemiDoc Imaging System (BioRad).

266

267 **Reporter gene measurements**

268 Fluorescence of the yellow fluorescent protein Venus was measured to determine the expression  
269 levels of various *E. coli* M1/5 *clbQ*- and *ybtA-venus* fusion strains.

270 For *clbQ-venus* reporter gene assays, 50 mL glucose-free M9 medium with pyruvate and casein  
271 hydrolysate were inoculated to an OD<sub>600</sub> of 0.05 from overnight cultures of respective strains  
272 as well as their controls (corresponding strains without the cloned *venus* gene). For strains  
273 carrying plasmids 100 µg mL<sup>-1</sup> ampicillin was added. During growth at 37 °C under shaking  
274 conditions, samples were drawn to determine the OD<sub>600</sub> for monitoring of growth and to  
275 measure fluorescence. Samples were centrifuged and washed once with phosphate buffered  
276 saline (PBS; 137 mM sodium chloride, 2.7 mM potassium chloride, 10.1 mM disodium  
277 hydrogen phosphate, 1.8 mM potassium dihydrogen phosphate, pH 7.4) and resuspended in  
278 PBS. 150 µl of each sample were transferred into a black 96-well polystyrene microplate with  
279 transparent and flat bottom (Greiner Bio-One, Bad Nenndorf, Germany) and fluorescence was  
280 determined in a Tecan Infinite 200 Reader (Tecan Group Ltd., Männedorf, Switzerland) with  
281 following parameters: 10 s shaking with an amplitude of two, absorption was measured at  
282 595 nm (10 nm bandwidth) and five flashes (pulses), fluorescence was excited at 485 nm  
283 (20 nm bandwidth) and emitted at 535 nm (25 nm bandwidth) with 50x amplification, 10  
284 flashes and 20 µs of integration time.

285 *E. coli* M1/5 strains carrying plasmids with *ybtA-venus* fusions were grown in glucose-free M9  
286 medium with pyruvate and casein hydrolysate in the presence of 100 µM 2,2'-dipyridyl to  
287 induce iron limitation, and 15 µg mL<sup>-1</sup> chloramphenicol. For each strain (including a strain with  
288 a promoterless *venus* gene as negative control) two wells of 150 µl fresh medium were  
289 inoculated to an OD<sub>600</sub> of 0.05 from overnight cultures. Cells were grown for 23 h in a Tecan  
290 Infinite 200 Reader (Tecan Group Ltd.) with a shaking amplitude of 2 and the parameters as

291 described for *clbQ-venus* fusion strains, except that absorbance and fluorescence were  
292 determined in 15 min-intervals with a 3-min shaking pause during each interval. For the  
293 measurement of fusion strains containing the *ybtA* or *lacUV5* promoter fused to the sequence  
294 encoding an artificial leader and the *venus* gene a 40x amplification of the fluorescence signal  
295 was applied.

296 Raw data were first corrected for autofluorescence of PBS (*clbQ-venus*) or M9 medium (*ybtA-*  
297 *venus*), respectively and the resulting values were then normalized to the OD<sub>595</sub>. The calculated  
298 fluorescence/OD<sub>595</sub> values of the negative control strains were subtracted from that of the  
299 respective fluorescent strains to correct for autofluorescence of bacteria.

300

### 301 **RNA electrophoretic mobility shift assays (RNA EMSA)**

302 Biotin-labelled and unlabeled RNA oligonucleotides representing the 5' untranslated leader  
303 transcripts of *clbQ*, *ybtA* and *phoB* as a negative control (7) were purchased from metabion  
304 GmbH (Planegg/Steinkirchen, Germany). Purified recombinant CsrA protein of *E. coli* (catalog  
305 # MBS1176282) was purchased from MyBioSource. EMSA were carried out using the  
306 LightShift™ Chemiluminescent RNA EMSA Kit (Thermo Fisher Scientific). Briefly, 10 µl  
307 reaction mixtures containing biotin-labeled RNA and increasing amounts of purified CsrA in  
308 incubation buffer (10 mM HEPES, 20 mM potassium chloride, 1 mM magnesium chloride,  
309 1 mM DTT, 10 µg yeast tRNA (Thermo Fisher Scientific), 40 units RNaseOUT™ (Thermo  
310 Fisher Scientific), pH 7.3) were prepared and incubated for 30 min at 37 °C to enable protein  
311 binding to RNA. For competitive EMSA, non-labeled RNA was added to the labelled RNA.  
312 After incubation, the samples were immediately loaded on precast native 8 % Tris Borate  
313 EDTA polyacrylamide gels (anamed Elektrophorese GmbH, Groß-Bieberau/Rodau, Germany)  
314 and run for 90 min 0.5x TBE and 80 V. Afterwards, samples were transferred onto a positively  
315 charged nylon membrane in 0.5x TBE and 300 mA for 37 min, which was followed by RNA  
316 crosslinking to the membrane using UV light (2x with 1,200 units). Biotinylated RNA was

317 detected with the chemiluminescent detection module (Thermo Fisher Scientific) according to  
318 the manufacturer's protocol and blots were analyzed in a ChemiDoc XRS+ System (Bio-Rad,  
319 Munich, Germany).

320

### 321 **Yersiniabactin quantification**

322 The amount of yersiniabactin produced by various *E. coli* strains was quantified using the  
323 *Salmonella* indicator strain WR1542 carrying the plasmid pACYC5.3L (gift from W. Rabsch,  
324 Wernigerode). This plasmid carries all necessary genes of the high pathogenicity island for  
325 uptake of yersiniabactin, *fyuA*, *ybtA*, *irp6*, *irp7* and *irp8*. Moreover, the plasmid harbors a  
326 transcriptional fusion of the *fyuA* promoter with the luciferase gene as a reporter allowing the  
327 detection of yersiniabactin-dependent upregulation of the *fyuA* promoter, thus indirect  
328 quantification of yersiniabactin. The method has been previously described in detail (8).

329

330 **References**

- 331 1. Datsenko KA, Wanner BL. 2000. One-step inactivation of chromosomal genes in  
332 *Escherichia coli* K-12 using PCR products. Proc Natl Acad Sci USA 97:6640-5.
- 333 2. Cherepanov PP, Wackernagel W. 1995. Gene disruption in *Escherichia coli*: TcR and KmR  
334 cassettes with the option of Flp-catalyzed excision of the antibiotic-resistance determinant.  
335 Gene 158:9-14.
- 336 3. Timmermans J, Van Melderen L. 2009. Conditional essentiality of the *csrA* gene in  
337 *Escherichia coli*. J Bacteriol 191:1722-4.
- 338 4. Nougayrède JP, Homburg S, Taieb F, Boury M, Brzuszkiewicz E, Gottschalk G, Buchrieser  
339 C, Hacker J, Dobrindt U, Oswald E. 2006. *Escherichia coli* induces DNA double-strand  
340 breaks in eukaryotic cells. Science 313:848-51.
- 341 5. Pérez-Berezo T, Pujo J, Martin P, Le Faouder P, Galano JM, Guy A, Knauf C, Tabet JC,  
342 Tronnet S, Barreau F, Heuillet M, Dietrich G, Bertrand-Michel J, Durand T, Oswald E,  
343 Cenac N. 2017. Identification of an analgesic lipopeptide produced by the probiotic  
344 *Escherichia coli* strain Nissle 1917. Nature Commun 8:1314.
- 345 6. Bossuet-Greif N, Vignard J, Taieb F, Mirey G, Dubois D, Petit C, Oswald E, Nougayrède  
346 JP. 2018. The colibactin genotoxin generates DNA interstrand cross-links in infected cells.  
347 mBio 9.
- 348 7. Jonas K, Edwards AN, Ahmad I, Romeo T, Romling U, Melefors O. 2010. Complex  
349 regulatory network encompassing the Csr, c-di-GMP and motility systems of *Salmonella*  
350 Typhimurium. Environ Microbiol 12:524-40.
- 351 8. Martin P, Marcq I, Magistro G, Penary M, Garcie C, Payros D, Boury M, Olier M,  
352 Nougayrède JP, Audebert M, Chalut C, Schubert S, Oswald E. 2013. Interplay between  
353 siderophores and colibactin genotoxin biosynthetic pathways in *Escherichia coli*. PLoS  
354 Pathog 9:e1003437.

356
