# Supplementary material for: Two Polyketides Intertwined in Complex Regulation: Posttranscriptional CsrA-Mediated Control of Colibactin and Yersiniabactin Synthesis in Escherichia coli
Source: PubMed Central journal article supplement (PMC8805033; doi:10.1128/mbio.03814-21), 2022-02-01
Supplement: mbio.03814-21-sf001.pdf [file mbio.03814-21-sf001.pdf]

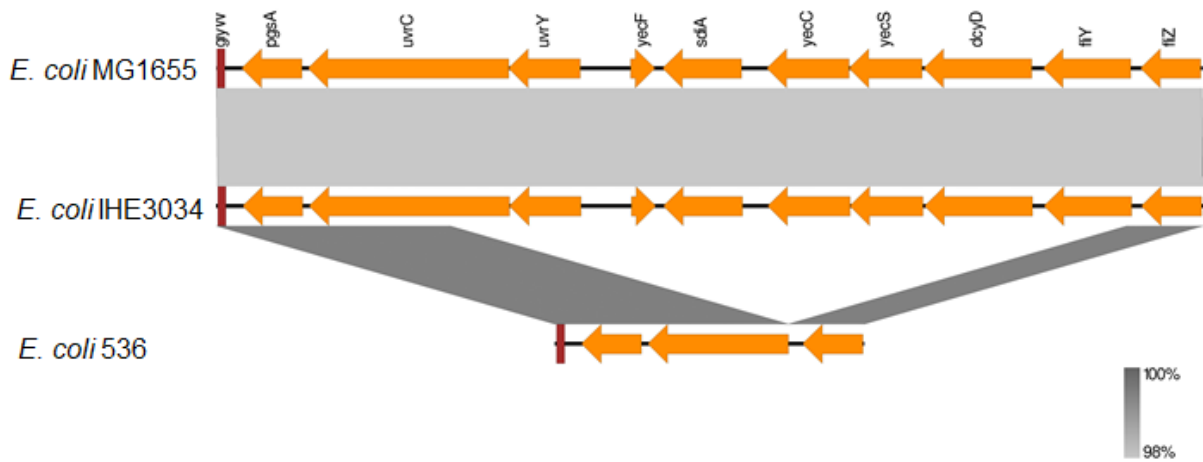

1

2 **Figure S1. Comparison of the genomic region comprising *uvrY* in different *E. coli* strains.**

3 Analysis of the chromosomal region next to *uvrY* in the complete genome sequences of *pks*  
 4 island-positive, but CPE-negative uropathogenic *E. coli* strain 536 with those of colibactin-  
 5 producing newborn meningitis isolate IHE3034 as well as to K-12 laboratory strain MG1655  
 6 indicated that *E. coli* 536 carries a 6.1-kb chromosomal deletion spanning the region between  
 7 *uvrC* and *fliY* and thus lacks the *uvrY* gene.
