# Supplementary material for: Two Polyketides Intertwined in Complex Regulation: Posttranscriptional CsrA-Mediated Control of Colibactin and Yersiniabactin Synthesis in Escherichia coli
Source: PubMed Central journal article supplement (PMC8805033; doi:10.1128/mbio.03814-21), 2022-02-01
Supplement: mbio.03814-21-sf002.pdf [file mbio.03814-21-sf002.pdf]

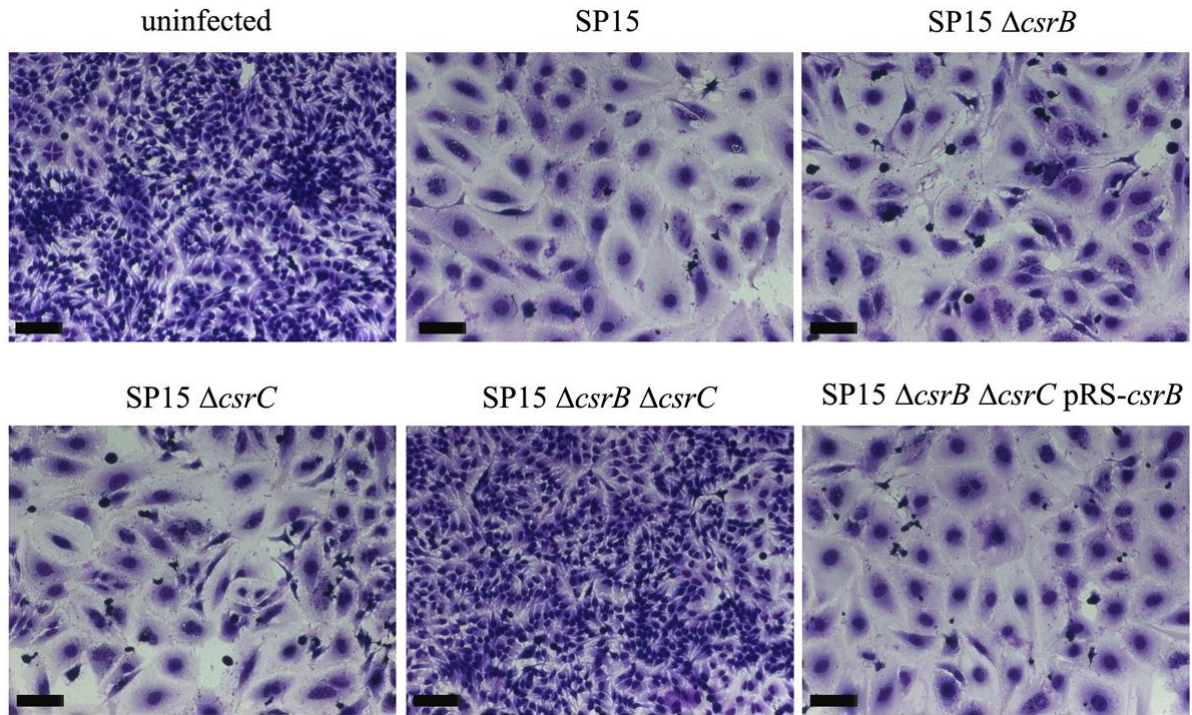

1

2 **Figure S2. Impact of the small regulatory RNAs *csrB* and *csrC* on the cytopathic effect of**  
 3 ***E. coli* strain SP15 in HeLa cells.** HeLa cells were either not infected or infected with the  
 4 indicated *E. coli* strains to a multiplicity of infection (MOI) of 250. After four hours of infection,  
 5 HeLa cells were washed to remove bacteria and further cultivated. 72 h post infection, cells  
 6 were washed and Giemsa-stained. Scale bars: 100  $\mu$ m. Plasmid pRS-*csrB* was used to  
 7 complement the *csrB* and *csrC* deletion in *E. coli* strain SP15 $\Delta$ *csrB*  $\Delta$ *csrC*.
