# Supplementary material for: Two Polyketides Intertwined in Complex Regulation: Posttranscriptional CsrA-Mediated Control of Colibactin and Yersiniabactin Synthesis in Escherichia coli
Source: PubMed Central journal article supplement (PMC8805033; doi:10.1128/mbio.03814-21), 2022-02-01
Supplement: mbio.03814-21-sf003.pdf [file mbio.03814-21-sf003.pdf]

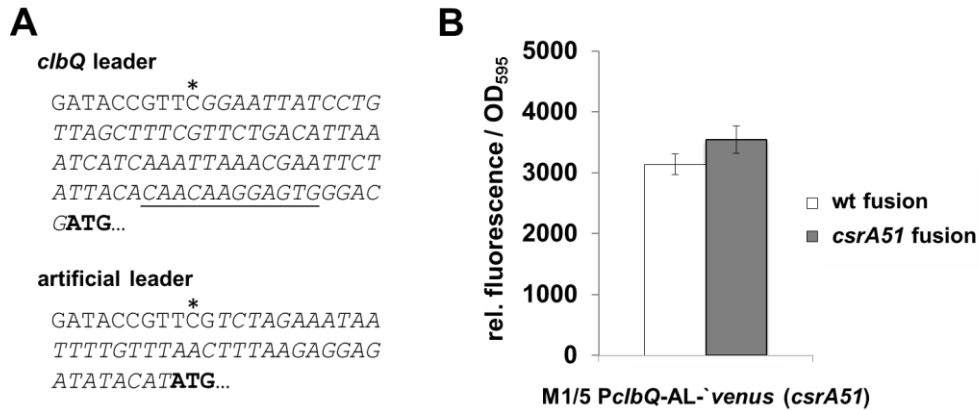

1

2 **Figure S3. Activity of the *clbQ* promoter fused to a sequence encoding an artificial 5'**  
 3 **untranslated leader and *venus* as a reporter gene. A)** Sequences encoding the *clbQ* 5' leader  
 4 and the artificial leader are shown in italics, an asterisk represents the transcription start, the  
 5 translational start codon is depicted in bold. The sequence encoding the putative CsrA binding  
 6 motif is underlined. **B)** Expression from the *clbQ* promoter in *E. coli* strains M1/5 *PclbQ*-AL-  
 7 '*venus* and M1/5 *PclbQ*-AL-'*venus* was measured by means of venus fluorescence after 10 h of  
 8 growth in M9 minimal medium without glucose but containing pyruvate and casein  
 9 hydrolysate. Mean values with standard deviations of three independent experiments are shown.
