# Supplementary material for: Two Polyketides Intertwined in Complex Regulation: Posttranscriptional CsrA-Mediated Control of Colibactin and Yersiniabactin Synthesis in Escherichia coli
Source: PubMed Central journal article supplement (PMC8805033; doi:10.1128/mbio.03814-21), 2022-02-01
Supplement: mbio.03814-21-st001.pdf [file mbio.03814-21-st001.pdf]

**Table S1. Oligonucleotides used in this study.**

| <b>Designation</b>      | <b>Sequence (5' to 3')</b>                                                   | <b>Purpose</b>                    |
|-------------------------|------------------------------------------------------------------------------|-----------------------------------|
| <b>Plasmid clonings</b> |                                                                              |                                   |
| <i>csrA</i> -XbaI-s     | GCGCTCTAGACAGCTGGGGTCGACAATTATC                                              | cloning of pWKS- <i>csrA</i>      |
| <i>csrA</i> -BamHI-as   | GCGCGGATCCGGAAAGATTAGTAACTGGACTGCTG                                          | cloning of pWKS- <i>csrA</i>      |
| <i>csrA</i> -NcoI-s     | GCGCCCATGGCAGCTGGGGTCGACAATTATC                                              | cloning of pKD46- <i>csrA</i>     |
| <i>csrA</i> -NcoI-as    | GCGCCCATGGTTAGTAACTGGACTGCTGG                                                | cloning of pKD46- <i>csrA</i>     |
| pKD46-Seq1              | ACGAGTATCGAGATGGCACA                                                         | control pKD46                     |
| pKD46-Seq2              | ATGGCTCTTGTATCTATC                                                           | control pKD46                     |
| IHAPJPN126              | GGGAATTCTCGTCTCCGTCAGTCAAAGC                                                 | cloning of pGEM- <i>csrC</i>      |
| IHAPJPN127              | GGGGATCCTGCGGCGGAATCTAACAG                                                   | cloning of pGEM- <i>csrC</i>      |
| <i>venus</i> -fus-s     | GGAGATATACATATGGTGTCTATCAC                                                   | <i>venus</i> template plasmid     |
| <i>venus</i> -fus-as    | GCGCGTCGACTTACTTGTACAGCTCGTCCATG                                             | <i>venus</i> template plasmid     |
| <i>PlacUV5</i> -s       | GCGCGACGTCTCATTAGGCACCCCAGGCTTTACACTTTATGCTT<br>CCGGCTCGTATAATGTGTGGATCTAGA  | <i>venus</i> template plasmid     |
| <i>PlacUV5</i> -as      | GATAGACACCATATGTATATCTCCTTCTTAAAGTTAAACAAAATTAT<br>TTCTAGATCCACACATTATACGAGC | <i>venus</i> template plasmid     |
| <i>venus</i> -XbaI      | GCGCTCTAGATGGTGTCTATCACTAAAGATCAAATC                                         | <i>venus</i> cloning              |
| MK67                    | CTTCTCTCATCCGCCAAAAC                                                         | <i>venus</i> cloning              |
| <i>venus</i> -Seq-as    | TACGTCGCCGTCCAGCTC                                                           | <i>venus</i> cloning              |
| <i>venus</i> -Seq-as    | TTCATGTGGTCGGGGTAGC                                                          | <i>venus</i> cloning              |
| <i>rrnB</i> -XbaI-for   | GCGCTCTAGACAGAACGCAGAAGCGGTCTG                                               | <i>rrnB</i> terminator cloning    |
| <i>rrnB</i> -SacI-rev2  | GCGCGAGCTCACGCAAAAAGGCCATCCG                                                 | <i>rrnB</i> terminator cloning    |
| <i>ybtA</i> -TLN-XbaI   | GCGCTCTAGACGGTGAATCACCTGCCAG                                                 | <i>ybtA</i> - <i>venus</i> fusion |
| <i>ybtA</i> -long-for   | GGAGATAACCAGGTCATGACGGAGTCAGTGTCTATCACTAAAG                                  | <i>ybtA</i> - <i>venus</i> fusion |

|                                    |                                                                                      |                          |
|------------------------------------|--------------------------------------------------------------------------------------|--------------------------|
| <i>ybtA</i> -long-rev              | CTTTAGTGATAGACACTGACTCCGTCATGACCTGGTTATCTCC                                          | <i>ybtA-venus</i> fusion |
| <i>ybtA</i> -int-up                | CGCCAGTCCAGCCAGAAC                                                                   | <i>ybtA-venus</i> fusion |
| <i>ybtA</i> -TLN-TTAT-for          | CATTGGTCTAAGCCTTATGGAGATAAC                                                          | <i>ybtA-venus</i> fusion |
| <i>ybtA</i> -TLN-TTAT-rev          | GACCTGGTTATCTCCATAAGGCTTAG                                                           | <i>ybtA-venus</i> fusion |
| <i>ybtA</i> -TXN-for               | TGAGAATTAATGTGAATAATAACCATTATCTAGAAATAATTTGTTT<br>AAC                                | <i>ybtA-venus</i> fusion |
| <b>Genome modifications</b>        |                                                                                      |                          |
| ABU_ <i>uvrY</i> :: <i>cat</i> _Fw | acgaatgactaactatcagtagcgttatccctattttctggagatattccTGTAGGCTGGAGCTGCTT<br>CG           | <i>uvrY</i> deletion     |
| ABU_ <i>uvrY</i> :: <i>cat</i> _Rv | tggctggctggttacgggttttaaaacgcttttgcgtcaaacgatcacCCTCCTTAGTTCCTATTC<br>CGAAG          | <i>uvrY</i> deletion     |
| <i>csrA</i> 51-Del-M15-up          | cgtaaatccccgaaggaagttctgtcaccgtgaagagatctaccagcgtacTAAGTGTAGGCTG<br>GAGCTGCTTC       | <i>csrA</i> modification |
| <i>csrA</i> -Del-M15-rev           | agagaaattttgagggtcgtctcaccgataaagatgagacgcggaagattaCATATGAATATCCT<br>CCTTAGTTC       | <i>csrA</i> modification |
| <i>ybtA</i> -Del-for               | cattcggttctattataccgcattggcttaagccacaggagataaccagtcGTGTAGGCTGGAGC<br>TGCTTC          | partial deletion of HPI  |
| <i>fyuA</i> -Del-rev               | ctggttttaactagtggttaaaaggatacctttcggatccctttacaataaCATATGAATATCCTC<br>CTTAGTTC       | partial deletion of HPI  |
| <i>clbQ</i> -TLN1- <i>venus</i> -s | cattaatcatcaaaataaacgaattctattacacaacaaggagtgggacgatgGTGTCTATCACTAA<br>AGATCAAATCGTG | <i>clbQ-venus</i> fusion |
| <i>clbQ</i> - <i>cat</i> -as       | ctttgatgatggaacagccatatctattgctcctgtatagttacacaactatttGCCTCAGGCATTTGA<br>GAAGC       | <i>clbQ-venus</i> fusion |
| <i>Kan</i> - <i>Plac</i> -fus-s    | CCAGCCTACACCTCATTAGGCACCCCAGGC                                                       | <i>clbQ-venus</i> fusion |
| <i>clbQ</i> - <i>PlacUV5</i> -as   | aatcgtttaatttgatgatttaatgtcagaacgaaagctaacaggataattccgTCCACACATTATACG<br>AGCCG       | <i>clbQ-venus</i> fusion |
| <i>clbQ</i> - <i>PlacUV5</i> -s    | gagtaacagttggcgtgtaataagtgatgtccgcttgcgcagacaatcgatcctcCATATGAATATC<br>CTCCTTAGTTC   | <i>clbQ-venus</i> fusion |

|                              |                                                                                               |                          |
|------------------------------|-----------------------------------------------------------------------------------------------|--------------------------|
| <i>Kan-Plac-fus-as</i>       | CTAATGAGGTGTAGGCTGGAGCTGCTTCG                                                                 | <i>clbQ-venus fusion</i> |
| <i>clbQ-TLN-TTAT-venus-s</i> | gcttcgtctgacattaaatcatcaaataaacgaattctattacacattatggagtgggacgatgGTGTCTAT<br>CACTAAAGATCAAATC  | <i>clbQ-venus fusion</i> |
| <i>clbQ-TXN-venus-s</i>      | cttgactggcgtttatcttggtatgggtccatcgagcgtgtggcgataccgttcgTCTAGAAATAATT<br>TTGTTTAACTTTAAG       | <i>clbQ-venus fusion</i> |
| <i>ybtA-TLN-venus-s2</i>     | ctcatctacccattcggttctattatacccgattggctctagccacaggagataaccaggtcatgGTGTCT<br>ATCACTAAAGATCAAATC | <i>ybtA-venus fusion</i> |
| <i>ybtA-cat-as</i>           | gcccggatggggtatccggcctctgtcaggaggagtttagggggcgcgaccccgGCCTCAGGC<br>ATTTGAGAAGC                | <i>ybtA-venus fusion</i> |
| <i>ybtA-PlacUV5-s</i>        | gaggtgtgaaccctgtaagcgcagaacaaaagtaagaccacgcagccgatcacCATATGAATAT<br>CCTCCTTAGTTCC             | <i>ybtA-venus fusion</i> |
| <i>ybtA-PlacUV5-as</i>       | ggcttagaccaatcgggtataatagaaccgaatgggtagatgatttgaTCCACACATTATAC<br>GAGCCG                      | <i>ybtA-venus fusion</i> |

**EMSA application**

|             |                                                                                      |          |
|-------------|--------------------------------------------------------------------------------------|----------|
| <i>clbQ</i> | CGGAAUUAUCCUGUUAGCUUUCGUUCUGACAUUAAAUCAUCAAAU<br>UAAACGAAUUCUAUUACACAACAAGGAGUGGGACG | RNA-EMSA |
| <i>ybtA</i> | AUCAUAACUCAUCUACCCCAUUCGGUUCUAUUUAUACCCGCAUU<br>GGUCUAAGCCACAGGGAGAUAAACCAGGUC       | RNA-EMSA |
| <i>phoB</i> | GCAUUAUGAUCGCAACCUAUUUUUACAACAGGGCAAAUCAUG                                           | RNA-EMSA |

---

1

- 2 Restriction sites are written in italics. Homologous sequences to either the genome sequences for genome modifications or to  
3 a plasmid required for restriction-free cloning are indicated by lowercase letters. *PlacUV5* promoter sequences are  
4 highlighted in bold.
